# Supplementary material
Source: PubMed Central journal article supplement (PMC3959252)

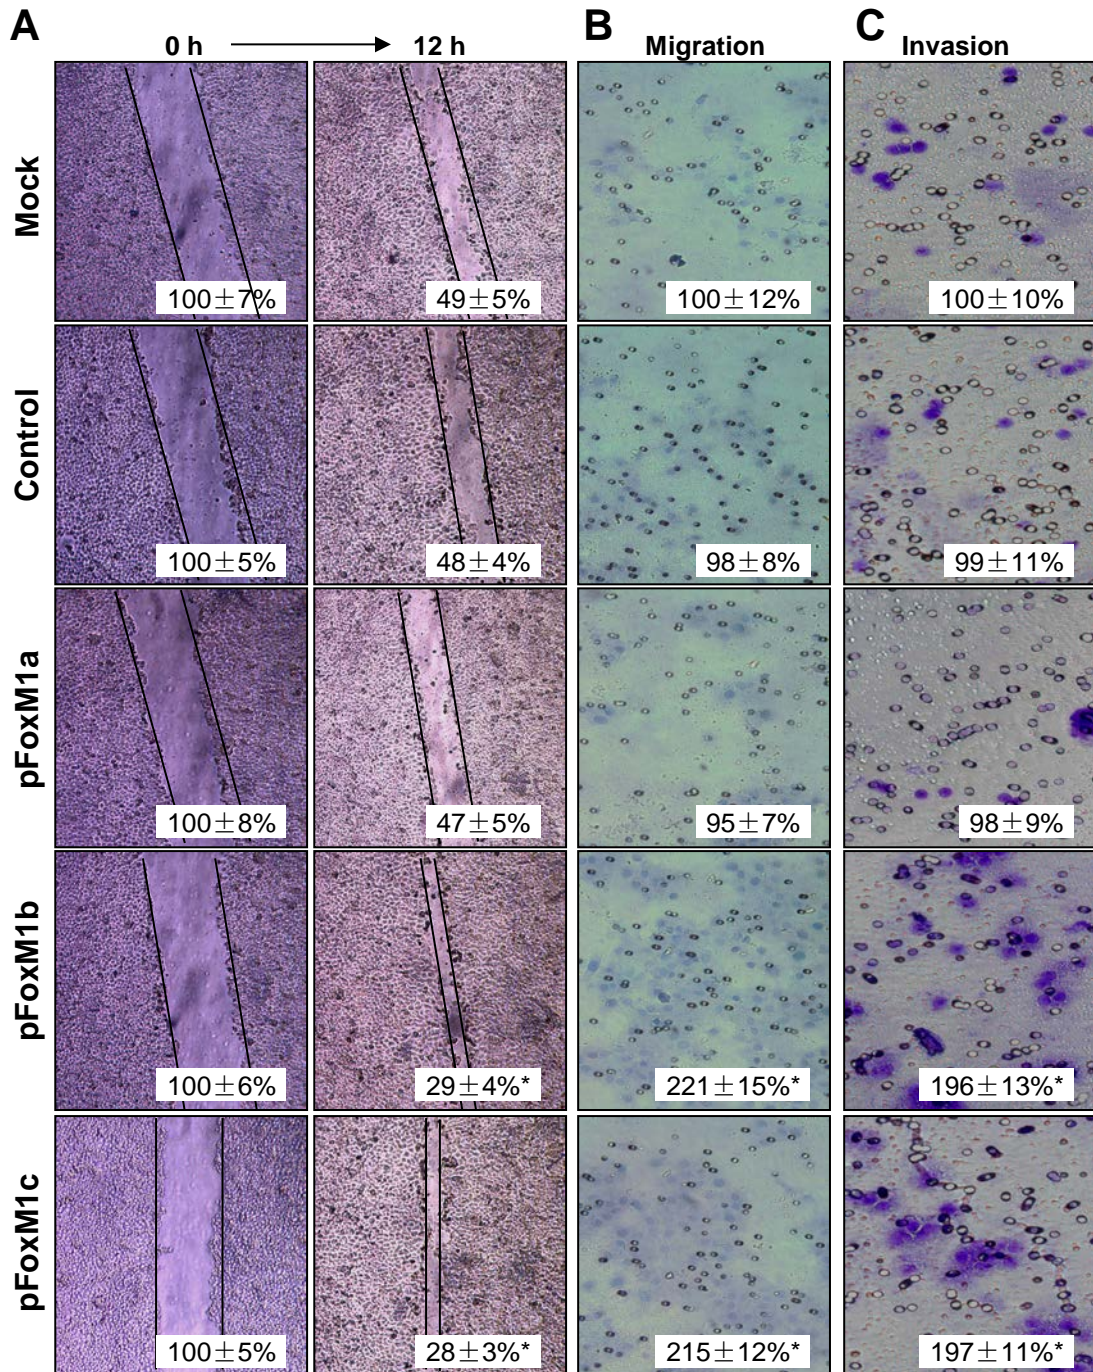

Supplement: NIHMS558145-supplement-1.pdf [file NIHMS558145-supplement-1.pdf]
